# Supplementary material for: Integrative transcriptomic analysis reveals key drivers of acute peanut allergic reactions
Source: PubMed Central journal article supplement (PMC5715016; doi:10.1038/s41467-017-02188-7), 2017-12-05
Supplement: 41467_2017_2188_MOESM1_ESM.pdf [file 41467_2017_2188_MOESM1_ESM.pdf]

## **Description of Additional Supplementary Files**

File Name: Supplementary Data 1

Description: List of all peanut response genes.

File Name: Supplementary Data 2

Description: Gene ontology results for peanut response (blue) module.

File Name: Supplementary Data 3

Description: Gene ontology results for up and down regulated genes in the peanut response (blue) module.
